# Supplementary material for: A Crowdsourcing Approach to Developing and Assessing Prediction Algorithms for AML Prognosis
Source: PubMed Central journal article supplement (PMC4924788; doi:10.1371/journal.pcbi.1004890), 2016-06-28
Supplement: pcbi.1004890.s010.pdf [file pcbi.1004890.s010.pdf]

## **DREAM 9 AML-OPC Consortium**

Team 89

Jose M. G. Vilar<sup>1</sup>

**1** Biophysics Unit (CSIC-UPV/EHU) and Department of Biochemistry and Molecular Biology, University of the Basque Country, Bilbao, Spain

Team Attractor Metagenes

Tai-Hsien Ou Yang<sup>1</sup>, Dimitris Anastassiou<sup>1</sup>

**1** Department of Systems Biology and Department of Electrical Engineering, Columbia University, New York, NY

Team BostonCompBio

Reynald Lescarbeau, Rebecca Lescarbeau

Team Chipmunks.

Honglei Xie<sup>1</sup>, Greg Chen<sup>1</sup>, Xihui Lin<sup>1</sup>, Geoffrey Hunter<sup>1</sup>

**1** Ontario Institute for Cancer Research, Toronto, ON, Canada

Team Clinical Persona

Ljubomir Buturovic<sup>1</sup>, Damjan Krstajic<sup>1,2</sup>, Alejandrina Pattin<sup>1</sup>

**1** Clinical Persona Inc, East Palo Alto, CA, USA

**2** Research Centre for Cheminformatics, Beograd, Serbia

Team Creighton

Chad J. Creighton<sup>1,2</sup>

**1** Department of Medicine and Dan L. Duncan Cancer Center, Baylor College of Medicine, Houston, TX, USA

**2** Department of Bioinformatics and Computational Biology, The University of Texas M. D. Anderson Cancer Center, Houston, TX, USA

#### Team CS

Sunho Park<sup>1</sup>, Minsoo Kim<sup>1</sup>, Alan Estrada<sup>1</sup>, Jae-Ho Cheong<sup>2,3</sup>, Tae Hyun Hwang<sup>1</sup>

**1** Department of Clinical Sciences, University of Texas Southwestern Medical Center, Dallas, TX, USA

**2** Department of Surgery, Yonsei University College of Medicine, Seoul, South Korea

**3** Department of Biochemistry & Molecular Biology, Yonsei University College of Medicine, Seoul, South Korea

#### Team EPD

Sunil Kumar<sup>1,2</sup>, René Dreos<sup>2</sup>, Giovanna Anbrosini<sup>1,2</sup>, Philipp Bucher<sup>1,2</sup>

**1** The Swiss Institute for Experimental Cancer Research (ISREC), School of Life Sciences, EPFL, Lausanne, Switzerland

**2** The Swiss Institute of Bioinformatics (SIB), EPFL, Lausanne, Switzerland

#### Team EvoMed

Li Liu<sup>1</sup>

**1** Department of Biomedical Informatics, Arizona State University, Tempe, AZ, USA

#### Team ICM CUDA Dreamers

Paweł Żuk<sup>1</sup>, Antoni Rościszewski<sup>1</sup>, Rafał Niemiec<sup>2</sup>, Mariusz Wrzesień<sup>2</sup>, Witold Rudnicki<sup>1</sup>

**1** Interdisciplinary Centre for Mathematical and Computational Modelling, University of Warsaw, Warsaw, Poland

**2** University of Information Technology and Management in Rzeszów, Rzeszów, Poland

#### Team JamesMcM

James McMurray<sup>1</sup>

**1** Max Planck Institute for Intelligent Systems, Tübingen, Germany

Team JP

Jinpu Li<sup>1</sup>

**1** University of Science and Technology of China, Hefei, Anhui, China

Team JTNL

Tom Ronan<sup>1</sup>, Jennifer Flynn<sup>2</sup>, Kristen Naegle<sup>1</sup>

**1** Department of Biomedical Engineering, Washington University in St. Louis, St. Louis, MO, USA

**2** Division of Biology and Biomedical Sciences, Washington University in St. Louis, St. Louis, MO, USA

Team Jyothi

Jyothi Korra<sup>1</sup>

**1** Christ University, Bengaluru, Kanataka, India

Team KAATZ-at-OSU

Kelly Regan<sup>1</sup>, Tasneem Motiwala<sup>1</sup>, Daniel Morgan<sup>1</sup>, Zachary Abrams<sup>1</sup>, Andrea Peabody<sup>1</sup>, Andrew Fitzgerald<sup>1</sup>

**1** Department of Biomedical Informatics, The Ohio State University College of Medicine, Columbus, OH, USA

Team nadal

Daniel Kim

Team Naoned e Breizh

Loic Champion<sup>1,2</sup>

**1** Integrated Center of Oncology, Biometrics Unit, St-Herblain, France

**2** Cancer Research Center Nantes-Angers, Nantes, France

Team sg\_139

Subharup Guha<sup>1</sup>, Veerabhadran Baladandayuthapani<sup>2,3</sup>

**1** Department of Statistics, University of Missouri, Columbia, MO, USA

**2** Department of Biostatistics, The University of Texas MD Anderson Cancer Center, Houston, TX, USA

**3** Department of Biostatistics, Rice University, Houston, TX, USA

Team Snail

Tiziana Sanavia<sup>1</sup>, Barbara Di Camillo<sup>1</sup>

**1** Department of Information Engineering, University of Padova, Padova, Italy

Team ssss

Seyyed A. Fatemi<sup>1</sup>, Anthony Kuh<sup>1</sup>

**1** Electrical Engineering Department, University of Hawaii at Manoa, Honolulu, HI, USA

Team SWlab

Kimberly Batten<sup>1</sup>, Jerry Shay<sup>1</sup>, Woodring Wright<sup>1</sup>

**1** UT Southwestern Medical Center at Dallas, Dallas, TX, USA

Team SWP

Scott W. Piraino

Team test\_ho

Maryam Hosseini<sup>1</sup>, Narayana Santhanam<sup>1</sup>

**1** Electrical Engineering Department, University of Hawaii at Manoa, Honolulu, HI, USA

Team TT

Hao Tang<sup>1</sup>, Xiao Zang<sup>1</sup>, Tao Wang<sup>1</sup>, Guanghua Xiao<sup>1</sup>, Yang Xie<sup>1</sup>

**1** University of Texas, Southwestern Medical Center, Dallas, TX, USA

Team YL

Yashu Liu<sup>1</sup>, Jieping Ye<sup>1</sup>, Sen Yang<sup>1</sup>, Tao Yang<sup>1</sup>

**1** Arizona State University, Tempe, AZ, USA

Team yoda

Maciej Fronczuk<sup>1</sup>, Weiyi Gu<sup>1</sup>, Ling-Hong Hung<sup>1</sup>, Vivian G. Oehler<sup>2</sup>, Kiyana Zolfaghar<sup>1</sup>, Ka Yee Yeung<sup>1</sup>

**1** Center for Data Science, Institute of Technology, University of Washington, Tacoma, WA, USA

**2** Clinical Research Division, Fred Hutchinson Cancer Research Center, Seattle, WA, USA
